# Supplementary material for: Genome-Wide Association Mapping of Grain Micronutrients Concentration in Aegilops tauschii
Source: PubMed Central journal article supplement (PMC6374599; doi:10.3389/fpls.2019.00054), 2019-02-07
Supplement: Table_1.pdf [file Table_1.pdf]

**Supplementary Table S1** Comparison of micronutrient concentration between hexaploid wheat cultivars (WL711 and PBW343) and *Aegilops tauschii* germplasm

| <b>Micronutrient</b> | <b>Concentration (ppm)</b> |              |                                        |
|----------------------|----------------------------|--------------|----------------------------------------|
|                      | PBW343 (Mean)              | WL711 (Mean) | Range in <i>Ae. tauschii</i> germplasm |
| Iron                 | 38.95                      | 35.05        | 30.33 – 69.44                          |
| Zinc                 | 24.60                      | 23.80        | 17.54 – 49.78                          |
| Copper               | 2.35                       | 1.18         | 1.02 – 6.50                            |
| Manganese            | 33.60                      | 21.69        | 15.02 – 59.10                          |
