# Supplementary material for: Genome-Wide Association Mapping of Grain Micronutrients Concentration in Aegilops tauschii
Source: PubMed Central journal article supplement (PMC6374599; doi:10.3389/fpls.2019.00054), 2019-02-07
Supplement: Table_2.pdf [file Table_2.pdf]

**Supplementary Table S2** Descriptive statistics of *Ae. tauschii* accessions for micronutrients concentration based on two lineages (L1, L2)

| Traits    | Lineage 1 (L1) |      |       | Lineage 2 (L2) |      |       |
|-----------|----------------|------|-------|----------------|------|-------|
|           | Mean<br>(ppm)  | S.D. | C.V%  | Mean<br>(ppm)  | S.D. | C.V%  |
| Iron      | 44.81          | 6.50 | 15.00 | 47.72          | 7.26 | 16.00 |
| Zinc      | 29.84          | 6.02 | 22.00 | 30.66          | 5.45 | 18.00 |
| Copper    | 3.26           | 0.90 | 27.00 | 3.71           | 1.06 | 30.00 |
| Manganese | 37.23          | 9.95 | 26.00 | 31.65          | 5.85 | 17.00 |
